# Supplementary material
Source: ML conference proceedings conference paper supplement (https://proceedings.mlr.press/v164/wang22h.html)
Supplement: Supplementary file 1 [file wang22h-supp.zip]

Archive with 4 entries (3 files):
- CoGAIL Supplementary Material/
- CoGAIL Supplementary Material/appendix.pdf
- __MACOSX/CoGAIL Supplementary Material/._appendix.pdf
- __MACOSX/CoGAIL Supplementary Material/._video.mp4
